# Supplementary material for: Mesothelin, Stereocilin, and Otoancorin are predicted to have superhelical structures with ARM-type repeats
Source: BMC Struct Biol. 2009 Jan 7;9:1. doi: 10.1186/1472-6807-9-1 (PMC2628672; doi:10.1186/1472-6807-9-1)

MSLN\_human GPFCAEVSGLS-TERVRELAVALAKNVKLSTEQLRCLA-----HRLSEPPE-----DLDALPLDLLLFLNPDAFSGPQACTRFFSRITKANVDLLPRGAPERQRLLPALACWGVRSLLSEADVRLGGLACDLPGRFV--AESAEVLLPRLVS  
MSLN\_rhesus GFTCVEVSGLS-TELVQELAVALGQKNVKLSAEQLRCLA-----HQLSEPPE-----DLDALPLDLLLFLNPDAFSGPQACTHFFSRVAKANVDLLPRGAPERQRLLPALTGWGVRSLLSEADVRLGGLACDLPGRFV--AESAEVLLPRLVR  
Msln\_mouse GLTCEVSDLS-MEQAKGLAMAVRQKNITLRGHQLRCLARRL--PRHLTDEE-----LNALPLDLLLFLNPDAMFPGQQAACAHFFSLISKANVDLPRRSLEQRLLMEALKCQGVYGFQVSEADVRLGGLACDLPGRFV--ARSEVLLPWLAR  
Msln\_rat GLTCEVSDLS-MGHAKELAMAVRQKNIVLQVHQLRCLARRL--PKHLTNEE-----LDALPLDLLLFLNPDAMFPGQQAACAHFFSLISKANVNVLPRRSLEQRLLTGALKCQGVYGFQVSETDARALGGLACDLPGEFV--AKSEVLLPWLAR  
MPFL\_human GFWCQPASQLP-RDQLSALIQLRALLQVPLQAWQLSCLANLA--SRCGLQDD-----FTLHPPNLLLFYNLSQVREAD-CRAFIRRAAGDVELLSLDPQRVALWRAAVACLGVARLRLSASDQQLGALVCDMDASSI--GAADPHMLLENLR  
Mpfl\_mouse NFWCLPASQLP-REQLSSLIRSLASQRVALKAWQLSCLANLA--AQLGLQDD-----FEFHPPNLLLFYDLSQVGDNTN-CRAFIHAAAGDTELLTNLPNQVALQRTALACLGGPHQLQSLASDILWLLGVLVCDMEAAQI--VTADPSVLRNLLR  
OTOA\_human GVTCSHIDAMS-TDFFLAHFQDFQNNFALLSPYQVNCLAWKYWEVSRLSMPPF-----LLAALPARYLASVPASQ-----CVPFLISLIGKSWLDSLVLDLSHKKTSLVRKVQCCLD--DSIADEYTVDIMGNLLCHLPAAIIDRGISPAWATALHG  
OTOA\_rhesus GVTCSHIDAMS-TDFFLAHFQDFQNNFALLSPYQVNCLAWKYWEVSRLSMPPF-----LLAALPARYLASVPASQ-----CVPFLISLIGKSWLDSLVLDLSHKKTSLVRKVQCCLD--NSIADEYTVDIMGNLLCHLPAAIIDRGISPAWATALHG  
Otoa\_mouse GVPCSHIDAMS-DHLFLALFQYFDNNFSLSPDQVNCLAWKYWEVSRLSMPPF-----LLATLPSRFLSSIPPSR-----CVRFLISLIGKRRLETLVLDSDKRSVVVRKVQCCLD--GVIADYTVDIVGHLLCHLPASFTIERGISPAWAAALHG  
OTOA\_dog GMTCSHIDAMS-ADSFLAHFHYFENNLSLLSPYQVNCLAWKYWEVSRLSMPPF-----LLAALPAHHLASVPASQ-----CVPFLISLIGKNQLDSLVLDLSHKKTSLVRKVQCCLN--NSIADEFAVDIVGKLLCHLPAAIHSIGISARAWATALHG  
OTOA\_chicken GVTCLIESMG-TDSFLNHFKVFENNHLHLLSPYQINCLAWKFWEVSNASIPPF-----FFLVLPTEYLEYISGPL-----CVPFIESLIGKTEVDLLSPSFHKKTETVLQKVQCCLN--GSITDEYDVLGNNLCHLPAPFLHARMSLKATATALHG  
OTOA\_Xenopus GLTCEHIDMD-KPSFLNHFKLLENSLSLLTPYQIHCLAWKYWKVSEATIPVF-----LLAVLPSERFASVSI-----CGSLISLIGKAEVLSVLVNLASKKERMKNKVDCLN--SSLADAYQLDMIGNLCHLSPKIIKSGISTDVIAAAINH  
STRC\_human GMSCEFLQQINS-MVDFLEVVMHIYQLPTRVRGSLRACI-WAELQ-RRMAMPEPEWTTIGPELNGLDLKLDDLPQLMDRLSNES-----IMLVVELVQRAPEQLLALTPHLQAALAERALONLAPKETPVSGEVLETGLPLVGFLGIEST-RQIPLQILLSHLSQ  
STRC\_rhesus GMSCEFLQQINS-MVDFLEVVMHIYQLPTRVRGSLRACI-WAELQ-RRMAMPEPEWTTIGPELNGLDLKLDDLPQLMDRLSNES-----IMLVVELVQRAPEQLLALTPHLQAALAERALONLAPKETPLSGEVLETGLPLVGFLGIEST-RQIPLQILLSHLSQ  
Strc\_mouse GMTCEFLQQISS-MVDFLDVVMHIYQLPTGVRESLRACI-WTELQ-RRMTMPEPELTTLGPELSELDTKLLLDLPQLMDRLSNDS-----IMLVVEMVQGAPEQLLALTPHLQALAAERALKNLAPKETPISKEVLETGLPLVGFLGIEST-RRIPLPILLSHLSQ  
Strc\_rat GMSCEFLQQISS-MVDFLDVVMHIYQLPTGVRESLRACI-WAELQ-RRMAMPEPELTTLGPELSELDTKLLLDLPQLMDRLSNDS-----VMLVVELVQGAPEQLLALTPHLQAALAERALKNLAPKETPISKEVLETGLPLVGFLGIDST-RRIPLPILLSHLSQ  
STRC\_dog GMSCEFLQQINLMADFLVVMHIYQLPTGVRESLRACI-WAELQ-RKMTMPEPELATLGSSELDTKLLLDSPYLMDRLSNES-----IMLMVELVRRRAPEQLLALTPHLRAAERALONLAPKETTVSREVLETGLPLVGFLGIEST-RRIPLPILLAHNLQ  
STRC\_cow GMSCEFLQQINWMADFLVVMHIYQLPTGVRESLRACI-WAELQ-RRMAMPEPELATLGSSELDTKLLLDLPVQLMDRLSNES-----IMLVVELVRRRAPEQLLALTPHLRAAERALONLAPKETTVSREVLETGLPLVGFLGIEST-RRIPLPILLAHNLQ  
STRC\_opossum GMTCEWLQQFWSRSDFLKVVVMHIYQLPNGVRGSLRACI-WBELQ-RKMMSSELGLGLGPDNLGLEQLLQFLLQIDRLSNDS-----ILLMLELIRGDPDELFLVLPPIRREALAERALRSLAPQDIPLSGEVLEALGPLVGSIGTESV-GRILPQILLAHLSR  
ruler 1.....10.....20.....30.....40.....50.....60.....70.....80.....90.....100.....110.....120.....130.....140.....150.....160.....

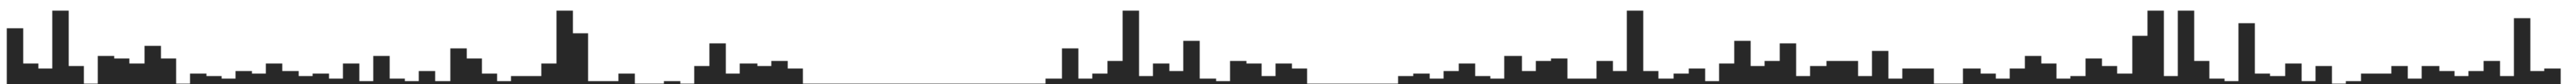

MSLN\_human ----CPGPLDDQEQEAARAALQGGGPPYGGPSTWSVSTMDALRGLLPVLGQPIIRSIPOGIVAAWROR-----SSRDPSW-----RQPETILRPRFRREVEKTACPSGKKAREIDES-----L--IFYKKWELEACVDAALLATQMDRVNAIP-FTYEQ  
MSLN\_rhesus ----CLGPLDDQEQEAARAALQGGGPPYGGPSTWSISTLDDQLSLLPVLGQPVHSIPOGILAAWROR-----SSRDPSW-----QQPEQTVLRLRFRRDVERTTCPEKEVEHIDES-----L--IFYKKRELEACVDALLAAQMDRVDAIP-FTYEQ  
Msln\_mouse ----CQGPLDDQSEKAVREVLRSGRTOYGGPPSKWSVSTLDALQSLVAVLDESIVQSIP-KDVKAEWLQH-----ISRDPSR-----LGSKLTVIHPFRRDAEQKACPPGKEPKVDEDED-----L--IFYQNWLEACVDGTMLARQMDLVNEIP-FTYEQ  
Msln\_rat ----CGGPLDDQGAKAVREVLRSGRAPYGGPSTWSVSTLDALQGLLVVLDESIVHSIP-KDVITEWLOG-----ISREPSR-----LGSKWTVIHPFRRDTEQKACPPGKEPNVVDEN-----L--IFYQNWLEACVDGTLLAGQMDLVNEIP-FTYEQ  
MPFL\_human ----CPR-LTAAORIALNSLLAGGKTSLGPPGSWTLEGLQALGPLATYISPHLWAVQVQ-EAVGLGFFRSVVASCQVGRLGQREARCFVTSFLESKTKPVSSRPRLSTGGPCVXGNITAATLRDD-----LFLVHYDCAELESCLDGCILRTNLDLTLQHL-LPTEC  
Mpfl\_mouse ----CPR-LTVMCTAALNTLLASGKTQIGPPGSWNLQGLQALGLLATYISPHLWEKVQ-EAVGLDFFRSVVAACRAGQLSRHDARRFVDNFLESKATSVSSRPKRRIGRSCVRGNITAATLHDD-----LFLVHYDCTQLESCLGTRVLRANLDLTLQHP-LPAEC  
OTOA\_human LRD-CPD-LNPEQKAARLKLKLL-GQ--YGLPQHWAETTKDLGPFVLVLSGDELSSIA-TKF-PEILLQAASKMARTLPTKEFLWAVFQSVRNSSDKIPSYDPMPGCHGVVAPSSDDIFKLAEA-----N--ACWALEDLR-CMEEDTFIRTVELLGAVQGFSTRPQ  
OTOA\_rhesus LRD-CPD-LNPKQKAARLKLKLL-GQ--YGLPQHWAETTKDLGPFVLVLSGDELSSIA-TKF-PEILLQAASKMARTLPPKEFLWAVFGSVRNSSDKIPSSDPMPGCHGVVAPSSDDIFKLAEA-----N--ACWALKDLR-CMEEDTFIRTVELLGAVQGFSTRPQ  
Otoa\_mouse LRS-CTA-LSSEQKAARVRLL-EG--WGPPENWTAETTKDLAPFLAFFSGDELHTVA-TKF-PEILQQTASKMVGVLPPKEFLWAVFESVQNSSNESPSFDPTEFGCHGVVTPSSDDIFKLAEA-----N--ACWDPEVLL-CMEEDTFIRNVELLGAVKGFSTRAQ  
OTOA\_dog LRD-CPG-LSPEQKAARLRLKLL-EG--YGLSRNWAETTKDLGPFVLVLSGDELSSVA-TKF-PEILQQTFSKIAGTLPPEPFLWAVFESVWNSSERNPSSHPSPGCHGVVAPSSDDIFKLAEA-----N--ACWAPEDLL-CMEEDTFIRSVELLGAVRAFSLPQ  
OTOA\_chicken FKL-CRQ-LSHEQKTEIKYKLL-EL--YGSPKNWTAETTKDLVGPFIAQLSKGELNVLA-EKF-PDIILRIAKTIGPPSSAEELLSTVFESVFNATASEPHLTPDCLGRAPSSDEIILKAEA-----N--VYWSAQELK-CMDAGTFDKNVELLGTVSGFNNSQ  
OTOA\_Xenopus LKS-CRN-LSPSNTTEIKYRLI-EL--YGHPSNWTSETVQDMAPFVNLLSKDEFLLDIL-KKF-QNTVQLQMVSEPPGIPLSKGILSVVFDVAVRLGVMNVANHTADCTGIMGSKERIMRKLMDA-----N--AFWSSAELQ-CIDIDTFKICVHILGAIQSFNSESQ  
STRC\_human LQGFC---LGETFATELGWLLL-QESVLGKPELWSQDEVEQAGRLVFTLSTEAISLIPREALGPETLERL-----LEKQQSWEQSRVQLCREPQLAAKKAALVAGVVRPAEADLPEPVPNCADVRGTFPAAWSATQIA-EMELSDFEDCLTLFAGDPGLGPEE  
STRC\_rhesus LQGFC---LGETFATELGWLLL-QESVLGKPELWSQDEVEQAGRLVFTLSTEAISLIPREALGPETLERL-----LEKQQSWEQSRVQLCREPQLAAKKAALVAGVVRPAEADLPEPVPNCADVRGTFPAAWSATQIA-EMELSDFEDCLTLFAGDPGLGPEE  
Strc\_mouse LQGFC---LGETFATELGWLLL-QEPVLGKPELWSQDEIEQAGRLVFTLSAEAISSIPREALGPETLERL-----LGKHQSWEQSRVGHLCGESQLAHKKAALVAGIVHPAAEGLQEPVPNCADIRGTFPAAWSATQIS-EMELSDFEDCLSLFAGDPGLGPEE  
Strc\_rat LQGFC---LGETFATELGWLLL-QEPVLGKPELWSRDEIEQAGRLVFTLSAEAISLIPREALGPETLERL-----LGKHQSWEQSRVGHLCGKSQLAHKKTALVAGIVHPAVEGLQDPVPNCADIRGTFPAAWSATQIA-EMELSDFEDCLSLFAGDPGLGPEE  
STRC\_dog LQGFC---LGEFATELGWLLS-QEPILGKPELWSEGEVEQAGRLVFTLSTEAISLIPREALGPETLERL-----LEKQQSWEQSRVQLCGTPQLAPKKAALVAGVVRPTAEDLSEVPVPNCADVRGTFPAAWSATQIA-EMELSDFEDCLALFAGDPGLGPEE  
STRC\_cow LQGFC---LGGFATELGWLLL-QEPVLGKPELWSQDEVEQAGRLIFTLSPEAISLIPREALGPETLERL-----LEKQQSWEQSRAGQLCAGPQLAPKKAALVAGLVRPAEENLPEPVPNCADVRGTFPSAWSAAQIA-DMELLDFFEDCLALFAGDPGLGPEK  
STRC\_opossum LQNFQ---LGEFVTELGCLLL-HESAFGRPELWSRDEVEQAGRLVFTLSQAAILLIPREALGPETLERL-----LERQQNWEQSRVQLCGGPVVLGPRKAALVTGAVQAEDENEPDPVPTCADIRGTFPAAWSAAQIT-EMELSDFFEDCLALFAGDPGLGPAE  
ruler 170.....180.....190.....200.....210.....220.....230.....240.....250.....260.....270.....280.....290.....300.....310.....320.....330.....

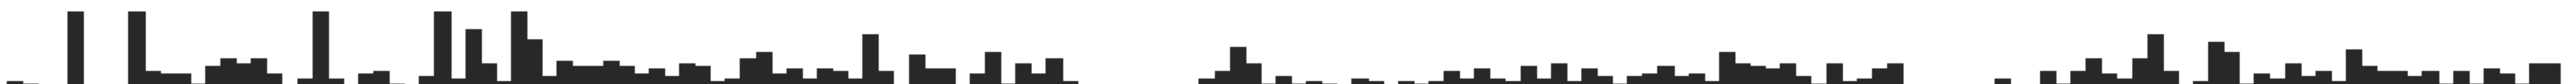

MSLN\_human LDVLKHKLDELY--PQGYPESVIQHLGYLFLKMSPEDIRKWNVTSLETIKALLLVNKGHEMSPOVATLIDRFVKGRQLDKDTLDTLTAFYPGY--LCSLSPEELSSVPPSSIWAV---RPQDLDTCDPRQLDVLYPKARLA--FQNMN--GSEYFVKIQSFLGG  
MSLN\_rhesus LDVLKHKLDELY--PQGYPESVIRHLGHLFLKMSPEDIRKWNVTSLETIKALLKVSKGHEMSAOVATLIDRVVGRQLDKDVTDTLTAFCPGC--LCSLSPERLSSVPPSVIGAV---RPQDLDTCGPRQLDVLYPKARLA--FQNMS--GSEYFVKIRPFLGG  
Msln\_mouse LSIFKHKLDKTY--PQGYPESLIQQLGHFFRYVSPEDIHOWNVTSPTDVKTLKLVSKGQKMDAIAIALVACYLRGGGQLDEDVMKALGDIPLSY--LCDFSPQDLHSHVPSVVMWL---GPQDLDKCSQRHLGLLYQKACSA--FQNVN--GLEEFKIKITFLGG  
Msln\_rat LSIFKHKLDKTY--PQGYPESLIKQLGHFFRYVSPEDIHOWNVTSPTDVTNLLKLVSKGQKMDAIAIALVACYLRGGGKLDEDIVKALDNIPLSY--LCDFSPQDLHAIPSSVVMWL---GLHDLDKCSQRHLGILYQKACSA--FQNVN--GLEEFKIRITFLGG  
MPFL\_human QHVVKAKLAQIV--PQGLPEDQLRLITSLVLYLSRTEIGQWSITSQDITVMALLASDVA--LENQTEAVLQKFLEHNGTVSGA-L---LLAIGGTRLCWMSPHQIOTIHPQELRLA---GALDLSSCPOSRKDVLYTKAHET--FGSSGTLA--AYVRLMRPYLGG  
Mpfl\_mouse QRVVAKLITQIV--PHGIPEDQLHLIPSLVLYLSLAEIGQWNITSQDITVMILLASD-A-ALDNOTEAVALQRFLDHNGKVTGA-L---LVAIGGSRLCWMSLKLQFIQPSFRLA---GAPDISPCPSRKDALFVKAHEV--FRNTSNVG--EYVYLIRPYLGG  
OTOA\_human LMTLKEKAIQVWDMPSYWRHHIVSLGRIALALNESELEQLDLSSIDTVASLSWQT-E-WTPGQAESILQGYLDDSGYSIQD-LKSFHLVGLGAT-LCAINITEIPLIKISEFRVVVARIGTLL---CSTHVLAEFKRKAEEV--FGDPTWTSVSVLQELGTIAAG  
OTOA\_rhesus LMTLKEKAIQVWDMPSYWRHHIASLGRIALALNESELEQLNLSSIDTVAFLTQQT-E-WSPROAESILQGFLLDSGYNIQD-LKSFHLVGLGAT-LCAINITEIPLIKISEFRVVVARIGTLL---CSTHVLAEFKRKAEEV--FGDPTWTSVSVLQELGTIAAG  
Otoa\_mouse LMALKEKAIQVWDLPSRWKEHHIVSLGRIALALNESELEQLDLSSIDTVASLGQQT-E-WTPGQAKSILQAFLED SGYGIQD-LKSFHLVGFGLPT-LCAMPTEIQLIKTSEFRVVVARIGTLF---CSTPVLGAFKKKAEEV--FGRPTWTSVSVLQELGTIAAG  
OTOA\_dog LVTLKEKAVQVWDMPSYWKHHITSLGRIALALNESELEQLDLSSIDTVVSLSQQT-E-WTPGQAKSILQGFLED SGYSVQD-LKSFHLVGLGTT-LCAMPNITEISLIKISEFRVVMARIGTLL---CSIHILAEFKRKAEEV--FGHPTKWSVSVLQELGTIAAG  
OTOA\_chicken LMALKEKAKQVWGSLLGWKSYHIVSLGHIALALTEIEELDLSIDTVSVLSQA-E-EWTLAQARSILQSFLED SGQTMST-LKSFDLVGLGAI-LCALNSTEIMSIRTAEFSAAVARIGLLL---CSTPVLKQFKKITESV--FGTATSWNGSVLQELGTIAGG  
OTOA\_Xenopus LSVLKEKAKEAWGDLPSWKSYHITSLGHIALALTEIEELDLSIDTVSVLSQA-E-EWTLAQARSILQSFLED SGQTMST-LKSFDLVGLGAI-LCAANAKQIEEIQTSEFRAVISRIGSLP---CEMSVLQAFKNKAEEV--YKSDQWSHFIIINDIGLIAAG  
STRC\_human LRAAMGKAKQLWGPPRGFRPEQILQLGRLLIGLGERELQELILVDWGVLSLIGQID-G-WSTQLRVVVSSFLRQSGRHVSH-LDFVHLTALGYT-LCGLRPEELOHISWEFSQAALFLGTLHLQ-CSEEQLEVLALHLLVLPGGFGPISNWGPEIFTEIGTIAAG  
STRC\_rhesus LRAAMGKAKQLWGPPRGFRPEQILQLGRLLIGLGERELQELILVDWGVLSLIGQID-G-WSTQLRVVVSSFLRQSGRHVSH-LDFVHLTALGYT-LCGLRPEELOHISWEFSQAALFLGTLHLQ-CSEEQLEVLALHLLVLPGGFGPISNWGPEIFTEIGTIAAG  
Strc\_mouse LRAAMGKAKQLWGPPRGFRPEQILQLGRLLIGLGERELQELTLVDWGVLSLIGQID-G-WSSMOLRAVVSSFLRQSGRHVSH-LDFIYLTALGYT-LCGLRPEELOHISWEFSQAALFLGSLHLP-CSEAQLEALAYLLVLPGGFGPVSNWGPEIFTEIGTIAAG  
Strc\_rat LQAAMGKAKQLWGPPRGFRPEQILQLGRLLIGLGERELQELTLVDWGVLSLIGQID-G-WSSVQLRAVVSSFLRQSGRHVSH-LDFIYLTALGYT-LCGLRPEELOHISWEFSQAALFLGSLHLP-CSEAQLEALAYLLVLPGGFGPVSNWGPEIFTEIGTIAAG  
STRC\_dog LRAAMGKAKQLWGPPRGFRPEQILQLSRLLIGLGERELQELILVDWGVLSLIGQID-G-WSSIQLRVVVSSFLRQSGRHVSH-LDFLHLTALGYT-LCGLRPEELOHISWEFSQAALFLGNLHLQ-CSEEQLEVLALHLLVLPGGFGPVSNWGPEIFTEIGTIAAG  
STRC\_cow LRAAMGKAKQLWGPPRGFRPEQILQLGRLLIGLGERELQELSLVDWGVLSLIGQID-G-WSSSOLRVVVSSFLRQSGRHVSH-LDFLHLTALGYA-LCGLRPEELOHISWEFSQAALFLGNLHLQ-CSEEQLEILALHLLVLPGGFGPVSNWGPEIFTEIGTIAAG  
STRC\_opossum LQAAMSKAKELWGPPQRHLHPEQILQLGRLLIGLGEHELOELILVDWAVLGALGLE-G-WSKIQQLQIIVSSFLHQSGRHVRN-LDFIHLTALGHA-LCGLRPEELQIINSEFEFSKAVLFLGFLPLQ-CSEEQLEALALHLLVLPGGFGLVSDWGPEIFTEVGSVAAG  
ruler ...340.....350.....360.....370.....380.....390.....400.....410.....420.....430.....440.....450.....460.....470.....480.....490.....500.....

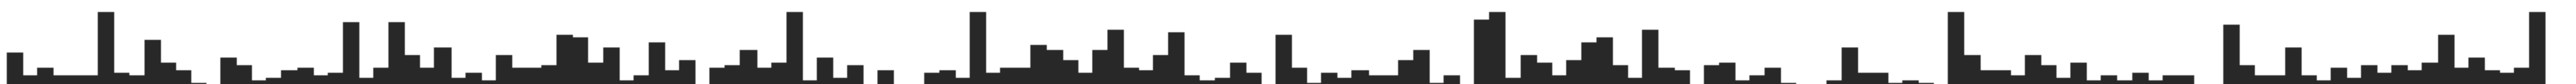

Supplement: Additional file 1 — Supplemental figure 1, Multiple alignments of the conserved regions of the 19 homologues of mesothelin precursor using MUSCLE. These alignments were used to construct the phylogenetic tree in Figure 4. The protein sequences include human, mouse and rat mesothelin precursors (accession numbers NP_005814, NP_061345, and NP_113846, respectively); mouse MPFL (MPF-like, also known as BC052484, accession number NP_808490); human, mouse, dog, and cow stereocilins (accession numbers NP_714544, NP_536707, XP_535452, and XP_606859, respectively); human, mouse, and Xenopus otoancorins (accession numbers NP_653273, NP_647471, and AAH79797, respectively); and predicted sequences of mesothelin precursor from rhesus macaque; MPFL from human; stereocilin from rhesus macaque, rat, and opossum; and otoancorin from rhesus macaque, dog, and chicken. The aligned regions of the representative proteins are: human mesothelin precursor, 68–502; mouse MPFL, 63–510; human stereocilin, 1194–1666; and human otoancorin, 570–1020. Coloring and the quality curve are as described at . '*' indicates fully conserved column, ':' strongly conserved and '.' weakly conserved. Human mesothelin sequence starts at position 273. The histogram below the alignment is the alignment quality curve. [file 1472-6807-9-1-S1.pdf]
